1 **Title: Neocortical activity tracks syllable and phrasal structure of self-produced speech**  
2 **during reading aloud**

3 **Authors:** Mathieu Bourguignon<sup>1,2,3</sup>, Nicola Molinaro<sup>1,4</sup>, Mikel Lizarazu<sup>5</sup>, Samu Taulu<sup>6,7</sup>,  
4 Veikko Jousmäki<sup>8</sup>, Marie Lallier<sup>1</sup>, Manuel Carreiras<sup>1,4</sup>, Xavier De Tiège<sup>2,9</sup>

5  
6 **Author Affiliations**

7 <sup>1</sup>BCBL, Basque Center on Cognition, Brain and Language, 20009 San Sebastian, Spain.

8 <sup>2</sup>Laboratoire de Cartographie fonctionnelle du Cerveau, UNI – ULB Neuroscience Institute, Université libre de  
9 Bruxelles (ULB), Brussels, Belgium.

10 <sup>3</sup>Laboratoire Cognition Langage et Développement, UNI – ULB Neuroscience Institute, Université libre de  
11 Bruxelles (ULB), Brussels, Belgium.

12 <sup>4</sup>Ikerbasque, Basque Foundation for Science, Bilbao, Spain.

13 <sup>5</sup>Laboratoire de Sciences Cognitives et Psycholinguistique, Département d'Etudes Cognitives, Ecole Normale  
14 Supérieure, EHESS, CNRS, PSL University, 75005 Paris, France

15 <sup>6</sup>Institute for Learning & Brain Sciences, University of Washington, Seattle, WA, USA

16 <sup>7</sup>Department of Physics, University of Washington, Seattle, WA, USA

17 <sup>8</sup>Department of Neuroscience and Biomedical Engineering, Aalto University School of Science, PO BOX  
18 15100, FI-00076-AALTO, Espoo, Finland.

19 <sup>9</sup>Magnetoencephalography Unit, Department of Functional Neuroimaging, Service of Nuclear Medicine, CUB –  
20 Hôpital Erasme, Brussels, Belgium

21  
22 **Corresponding Author**

23 Mathieu Bourguignon, Laboratoire de Cartographie fonctionnelle du Cerveau, UNI – ULB  
24 Neuroscience Institute, Université libre de Bruxelles, 808 Lennik Street, 1070 Brussels,  
25 Belgium. E-mail: mabourgu@ulb.ac.be Tel. +32 2 555 3286.

26  
27 **Highlights**

- 28 ● The brain tracks phrasal and syllabic rhythmicity of self-produced (read) speech.  
29 ● Tracking of phrasal structures is attenuated during reading compared with listening.  
30 ● Speech rhythmicity mainly drives brain activity during reading and listening.  
31 ● Brain activity drives syllabic rhythmicity more during reading than listening.

32

33 **Abstract**

34 To gain novel insights into how the human brain processes self-produced auditory  
35 information during reading aloud, we investigated the coupling between neuromagnetic  
36 activity and the temporal envelope of the heard speech sounds (i.e., speech brain tracking) in  
37 a group of adults who 1) read a text aloud, 2) listened to a recording of their own speech (i.e.,  
38 playback), and 3) listened to another speech recording. Coherence analyses revealed that,  
39 during reading aloud, the reader's brain tracked the slow temporal fluctuations of the speech  
40 output. Specifically, auditory cortices tracked phrasal structure (<1 Hz) but to a lesser extent  
41 than during the two speech listening conditions. Also, the tracking of syllable structure (4–8  
42 Hz) occurred at parietal opercula during reading aloud and at auditory cortices during  
43 listening. Directionality analyses based on renormalized partial directed coherence revealed  
44 that speech brain tracking at <1 Hz and 4–8 Hz is dominated by speech-to-brain directional  
45 coupling during both reading aloud and listening, meaning that speech brain tracking mainly  
46 entails auditory feedback processing. Nevertheless, brain-to-speech directional coupling at 4–  
47 8 Hz was enhanced during reading aloud compared with listening, likely reflecting speech  
48 monitoring before production. Altogether, these data bring novel insights into how auditory  
49 verbal information is tracked by the human brain during perception and self-generation of  
50 connected speech.

51

52 **Keywords**

53 Reading; speech perception; speech production; connected speech; speech brain tracking;  
54 magnetoencephalography

55

56

57

## 58 **1. Introduction**

59 To produce understandable speech, humans rely on self-monitoring of speech output.  
60 Such monitoring is based on neural integration of self-generated sensory information, which  
61 links speech production to speech perception (for a review, see Hickok, 2012). Still, how this  
62 self-produced sensory information is used to control speech remains unclear.

63 Current theories of language production consider a feedback monitoring system that  
64 monitors speech output to correct errors during production (for reviews, see Hickok, 2012;  
65 Houde and Chang, 2015). Evidence about the importance of such a system comes from  
66 adaptations of the speaker's speech output to compensate for sensory (i.e., auditory and  
67 somatosensory) feedback manipulations (Bauer et al., 2006; Burnett et al., 1998; Guo et al.,  
68 2017; Houde, 1998; Liu et al., 2018; Shiller et al., 2009; Tremblay et al., 2003). But such  
69 feedback monitoring system cannot account for extremely fast self-corrections of speech  
70 observed in humans (Blackmer and Mitton, 1991; Nozari et al., 2011), as they require  
71 extended neural processing time. Hence, most of the current models of language production  
72 additionally include an internal speech monitoring system, which monitors speech before  
73 production. Consensus about the neural bases of such an internal system is however lacking  
74 (Gauvin et al., 2016). Indeed, some authors consider that internal speech is monitored via  
75 sensory networks similar to those involved in monitoring feedback speech (Hickok, 2012;  
76 Indefrey, 2011), while others consider that it recruits distinct neural structures such as, e.g.,  
77 brain structures involved in conflict monitoring (Hickok, 2012; Nozari et al., 2011).

78 A potential way to gain insights into the neuronal bases of internal and feedback  
79 speech monitoring systems is to study the coupling between the speaker's voice and its own  
80 brain activity during connected speech production. Previous magnetoencephalography  
81 (MEG) studies focusing on connected speech listening demonstrated speech-sensitive  
82 coupling between the slow modulations of the speaker's voice and listeners' (mainly auditory)

83 cortex activity (Bourguignon et al., 2013; Clumeck et al., 2014; Ding et al., 2016; Gross et  
84 al., 2013; Molinaro et al., 2016; Peelle et al., 2013; Vander Ghinst et al., 2016). This coupling  
85 henceforth referred to as *speech brain tracking*, mainly occurs at syllable (4–8 Hz) and  
86 phrasal/sentential (<1 Hz) rates. It is considered to play a pivotal role in parsing connected  
87 speech into smaller units (i.e., syllables or phrases/sentences) to promote subsequent speech  
88 recognition (Park et al., 2018; Zion Golumbic et al., 2012). Additionally, it might help predict  
89 the precise timing of events in the speech stream such as syllables and phrases/sentences  
90 (Zion Golumbic et al., 2012). Such predictions probably facilitate speech comprehension as  
91 well as coordination of turn-taking transitions during verbal conversation (Friston and Frith,  
92 2015; Zion Golumbic et al., 2012). It is then sensible to hypothesize that similar speech brain  
93 tracking is also at work during connected speech production and contribute to self-produced  
94 speech monitoring systems. If confirmed, this could bring unprecedented insights into how  
95 humans handle self-generated auditory information during language production. Additionally,  
96 investigating coupling directionality (i.e., speech → brain vs. brain → speech coupling)  
97 during connected speech production could bring critical information about the neural bases of  
98 speech production monitoring systems in humans: feedback (speech → brain coupling) vs.  
99 internal (brain → speech coupling).

100 To address these issues, the present MEG study relied on the comparison of speech  
101 brain tracking while subjects listened to recordings of texts read aloud (by a reader or  
102 themselves) and while they read themselves a text aloud. This approach was first chosen  
103 because previous studies from our group that investigated speech brain tracking during  
104 listening relied on live (Bourguignon et al., 2013; Clumeck et al., 2014) or recorded  
105 (Clumeck et al., 2014; Destoky et al., 2019; Vander Ghinst et al., 2019, 2016) voices  
106 continuously reading a text aloud. Second, it was also based on the shared neurocognitive  
107 processes between natural speech production and reading aloud (Sulpizio and Kinoshita,

108 2016). Indeed, reading aloud is recognized as a type of speech production such as, e.g.,  
109 spontaneous narrative, narrative recalls, conversation, picture description (see, e.g., Bóna,  
110 2014). The last stages of language production in those different speech situations are similar:  
111 all include phonological encoding (i.e., assigning a segment to a position in a metrical frame),  
112 phonetic encoding (i.e., retrieving the motor plans required for articulation), and articulation  
113 (i.e., producing the gestures leading to an acoustic sound) (Kawamoto et al., 2015). Settling  
114 on reading aloud also makes it possible to control speech content and linguistic form, which  
115 are two speech features previously reported to affect brain rhythms (Alexandrou et al., 2017).  
116 Reading aloud decreases the subjects' need to focus on semantic/lexical access, other  
117 cognitive processes or speech style, which can potentially bias speech brain tracking and  
118 directionality assessments during language production (Bóna, 2014). Finally, comparing the  
119 neural processes at play during listening to somebody reading aloud and during reading aloud  
120 allows relying on auditory verbal information that shares common rhythmicity and prosody.

121 In practice, this MEG study investigates, using coherence and directionality analyses,  
122 speech brain tracking in subjects who (i) read a text aloud, (ii) listened to a recording of a  
123 different text, and (iii) listened to a recording of their own speech while reading aloud (i.e.,  
124 playback). It was specifically designed to (i) identify cortical areas that track the slow  
125 fluctuations of self-produced speech, (ii) determine the causal nature of this tracking, and (iii)  
126 assess tracking differences between reading aloud and listening.

127

## 128 **2. Methods**

### 129 **2.1. Participants**

130 Eighteen healthy native Spanish speakers without any history of neuropsychiatric  
131 disease or language disorders were studied. One participant was excluded from the study due  
132 to excessive artifacts in the data. The study therefore reports on 17 participants (range 20–32

133 years; mean age 23.9 years; 9 females and 8 males). Sixteen participants were right-handed  
134 according to Edinburgh handedness inventory (score range 40–100 %; mean  $\pm$  SD, 70.6  $\pm$   
135 19.1 %) (Oldfield, 1971). Handedness appraisal was missing from the last participant.  
136 Thirteen participants had a university degree, 1 was a master student, and 3 were trained  
137 professional with high school or secondary school degree (degree obtained at age  $\sim$ 18 or  $\sim$ 16  
138 respectively when no grade is repeated). The study was approved by the BCBL Ethics  
139 Committee. Participants were included in the study after written informed consent.

## 140 **2.2. Experimental paradigm**

141 The experimental stimuli were derived from 2 narrative texts of  $\sim$ 1000 words. The  
142 topics of the texts were maximally neutral: the first elaborated on the origin of life and human  
143 spirituality, while the second was an attempt to define what is a “discourse”. Both texts were  
144 read aloud by a male and a female native Spanish speaker and recorded with a high quality  
145 microphone. Reading pace was of 152  $\pm$  35 words/min (mean  $\pm$  SD across the four  
146 recordings).

147 Participants underwent four experimental conditions (*read*, *listen*, *playback*, and *rest*)  
148 lasting  $\sim$ 5 minutes each while they were sitting in the MEG chair with their head inside the  
149 MEG helmet. During the *read* condition, participants continuously read aloud one of the two  
150 texts printed on A4 pages. During the *listen* condition, they listened to the audio recording of  
151 the other text read by the reader of their gender. Texts were assigned to conditions in a  
152 counterbalanced manner. During the *playback* condition, participants listened to their own  
153 voice recorded (see 2.3. for recording data acquisition details) earlier during the *read*  
154 condition. Obviously, *playback* condition was performed in all subjects after the *read*  
155 condition. This *playback* condition was used (i) to assess the impact of possible sensory  
156 prediction about upcoming speech (as subjects had some hints about speech content and  
157 production from the prior *read* condition) on speech brain tracking and on tracking

158 directionality, and (ii) to control for potential differences in speech rhythm between *listen* and  
159 *read*. For both *listen* and *playback* conditions, sounds were played with VLC running on a  
160 MacBook pro and delivered at 60 dB (measured at ear-level in every participant) through a  
161 front-facing flat-panel loudspeaker (Panphonics Oy, Espoo, Finland) placed ~2 m from the  
162 participants. During *rest* condition, participants were asked to fixate the gaze at a point on the  
163 wall of the magnetically shielded room (MSR) and try to reduce blinks and saccades to the  
164 minimum. The order of the conditions was either *read–listen–rest–playback* or *listen–read–*  
165 *rest–playback*.

### 166 **2.3. Data acquisition**

167 Neuromagnetic signals were recorded at the Basque Centre on Cognition, Brain and  
168 Language (BCBL) with a whole-scalp-covering neuromagnetometer installed in a MSR  
169 (Vectorview & Maxshield<sup>TM</sup>; MEGIN Elekta Oy, Helsinki, Finland). The 306-channel MEG  
170 sensor layout consisted in 102 sensor triplets, each comprising one magnetometer and two  
171 orthogonal planar gradiometers characterized by different patterns of spatial sensitivity to  
172 right beneath or nearby cortical sources. The recording pass-band was 0.1–330 Hz and the  
173 signals were sampled at 1 kHz. The head position inside the MEG helmet was continuously  
174 monitored by feeding current to five head-tracking coils located on the scalp and observing  
175 the corresponding coil-induced magnetic field patterns by the MEG sensors. Head position  
176 indicator coils, three anatomical fiducials, and at least 150 head-surface points (covering the  
177 whole scalp and the nose surface) were localized in a common coordinate system using an  
178 electromagnetic tracker (Fastrak, Polhemus, Colchester, VT, USA).

179 An optical fiber microphone was placed inside the MSR to record participants' voice  
180 during the *read* condition. To maximize sound quality, the microphone was taped to the edge  
181 of the MEG helmet, ~5 cm away from subjects' mouth. Sound signals were recorded with  
182 *Audacity* at a sampling rate of 44.1 kHz. Electrooculograms (EOG) monitored vertical and

183 horizontal eye movements, and electrocardiogram (ECG) recorded heartbeat signals. All  
184 these signals were recorded time-locked to MEG signals.

185 High-resolution 3D-T1 cerebral magnetic resonance images (MRI) were acquired on a  
186 3 Tesla MRI scan (Siemens Medical System, Erlangen, Germany).

#### 187 **2.4. Data preprocessing**

188 As reading aloud is typically associated with many sources of high-amplitude artifacts  
189 in electrophysiological signals (e.g., head movements, muscle artifacts, eye movements, etc.),  
190 special care was taken during data preprocessing to subtract as much as possible these  
191 artifacts from raw MEG data.

192 Continuous MEG data were first preprocessed off-line using the temporal signal space  
193 separation (tSSS) method (correlation coefficient: 0.9 and the segment length of the temporal  
194 projection set equal to the file length) to subtract external interferences, to correct for head  
195 movements, and to dampen movement artifacts induced by reading aloud (Taulu et al., 2005;  
196 Taulu and Simola, 2006). To further suppress heartbeat, eye-blink, and eye-movement  
197 artifacts, 30 independent components were evaluated from the MEG data low-pass filtered at  
198 25 Hz using FastICA algorithm (dimension reduction, 30; non-linearity, tanh) (Hyvärinen et  
199 al., 2001; Vigario et al., 2000). Independent components displaying a correlation exceeding  
200 0.15 with any EOG or ECG signals were subtracted from MEG data. The mean  $\pm$  SD of  
201 rejected components was  $7.2 \pm 1.4$  (*read*),  $5.1 \pm 1.8$  (*listen*),  $4.9 \pm 2.0$  (*rest*), and  $5 \pm 2.0$   
202 (*playback*). Finally, when the maximum MEG amplitude exceeded 5 pT (magnetometers) or  
203 1 pT/cm (gradiometers), data within one second before and after the excessive amplitude  
204 were marked as artifact-contaminated to avoid analysis of MEG data compromised by any  
205 other artifact source that would not have been removed by the temporal signal space  
206 separation or independent component analysis.



207           Speech temporal envelopes were obtained from all sound recordings as the rectified  
208 sound signals low-pass filtered at 50 Hz. Speech temporal envelopes were further resampled  
209 at 1000 Hz time-locked to MEG signals.

## 210 **2.5. Coherence analysis**

211           To perform frequency and coherence analyses, continuous data obtained in all  
212 conditions (*listen, playback, read and rest*) were split into 2-s epochs with 1.6-s epoch  
213 overlap, leading to a frequency resolution of 0.5 Hz (Bortel and Sovka, 2014). MEG epochs  
214 containing periods marked as artifact contaminated were discarded from further analyses.  
215 Also, for each participant, only the minimum amount of epochs across all conditions was  
216 used for subsequent analyses. These steps led to  $703 \pm 45$  artifact-free epochs of MEG and  
217 voice envelope signals for each participant and condition.

218           Coherence is an extension of Pearson correlation coefficient to the frequency domain  
219 that determines the degree of coupling between two signals, providing a number between 0  
220 (no linear dependency) and 1 (perfect linear dependency) for each frequency (Halliday,  
221 1995). Coherence was previously used to assess the coupling between voice and brain signals  
222 at the frequencies corresponding to phrasal/sentential (<1 Hz) and syllable (4–8 Hz) rates  
223 (Bourguignon et al., 2013; Luo and Poeppel, 2007; Molinaro and Lizarazu, 2017; Peelle et  
224 al., 2013; Poeppel, 2003; Vander Ghinst et al., 2016).

225           Coherence was first estimated at the sensor level. Data from gradiometer pairs were  
226 combined in the direction of maximum coherence as done in Bourguignon et al. (2015).  
227 Coherence at phrasal/sentential level was taken at the frequency bin corresponding to 0.5 Hz,  
228 and coherence at syllable level was taken as the mean across coherence at frequency bins  
229 comprised in 4–8 Hz.

230           Coherence was also evaluated at the source level using a beamformer approach since  
231 this method has a high sensitivity to activity coming from locations of interest while

232 attenuating external interferences such as reading-induced head movement, eye movements,  
233 or muscle artifacts (Hillebrand et al., 2005). To do so, individual MRIs were first segmented  
234 using Freesurfer software (Martinos Center for Biomedical Imaging, Massachusetts, USA;  
235 Reuter et al., 2012). Then, the MEG forward model was computed for three orthogonal  
236 tangential current dipoles placed on a homogeneous 5-mm grid source space that covered the  
237 entire brain (MNE suite; Martinos Center for Biomedical Imaging, Massachusetts, USA;  
238 Gramfort et al., 2014) and further reduced to its two first principal components. Finally,  
239 coherence maps were produced within the computed source space at 0.5 Hz and 4–8 Hz using  
240 Dynamic Imaging of Coherent Sources (DICS) (Gross et al., 2001), and further interpolated  
241 onto a 1-mm grid. Both planar gradiometers and magnetometers were used for inverse  
242 modeling after dividing each sensor signal by its noise variance. Despite the fact that raw  
243 magnetometer signals are considered noisier than planar gradiometers, in the framework of  
244 signal space separation, signals from both sensor types are reconstructed from the same inner  
245 components, corresponding to the magnetostatic multipole expansion, and have therefore  
246 similar levels of residual interference after suppression of signals from external sources  
247 (Garcés et al., 2017). This explains why both sensor types were used for source  
248 reconstruction. The noise variance was estimated from the continuous *rest* MEG data band-  
249 passed through 1–195 Hz, for each sensor separately. As the analyses described in a further  
250 paragraph require extracting the time course of some sources, we used the additional  
251 constraint that beamformer weight coefficients are real-valued. This constraint is sensible  
252 since one can easily argue that electrical currents in the brain are real-valued. Practically, it  
253 leads to using the real part of the cross-spectral density matrix in DICS beamformer  
254 computation.

255 To compute group-level coherence maps, a non-linear transformation from individual  
256 MRIs to the standard Montreal Neurological Institute (MNI) brain was first computed using

257 the spatial-normalization algorithm implemented in Statistical Parametric Mapping (SPM8,  
258 Wellcome Department of Cognitive Neurology, London, UK; Ashburner et al., 1997;  
259 Ashburner and Friston, 1999) and then applied to individual MRIs and coherence maps. This  
260 procedure generated a normalized coherence map in the MNI space with 1-mm cubic voxels  
261 for each subject, condition and frequency of interest (i.e., 0.5 Hz and 4–8 Hz). Group-level  
262 maps were obtained by averaging the normalized coherence maps across participants and  
263 conditions.

## 264 **2.6. Directionality assessment**

265 The directionality of the coupling between the voice signals and the activity within  
266 brain areas displaying a significant local maximum of coherence (see 2.8.), was assessed with  
267 renormalized partial directed coherence (rPDC) (Schelter et al., 2009, 2006). To this aim, the  
268 time-course of brain electrical activity within these brain areas was estimated with the  
269 beamformer described in 2.5., in the direction maximizing the coherence with speech  
270 temporal envelope. Source and voice signals were low-pass filtered at 10 Hz and down-  
271 sampled at 20 Hz. Then, for each source separately, a vector autoregressive (VAR) model of  
272 order 40 was fitted to the source and the voice data using the ARfit package (Schneider and  
273 Neumaier, 2001). The rPDC was then estimated based on the Fourier transform of the VAR  
274 model coefficients. This enabled for estimating rPDC at frequencies from 0 to 10 Hz with 0.5  
275 Hz resolution.

276

## 277 **2.7. Partial coherence to control for artifacts**

278 In the *read* condition, there was a discrepancy between sensor and source-level results  
279 (see Results section). In the sensor space, strong artifacts at the edge of the sensor array  
280 obscured the 4–8-Hz speech brain tracking. In the source space, artifacts were present but

281 genuine speech brain tracking in auditory cortices was clearly visible thanks to the use of the  
282 beamformer approach. To verify that this discrepancy pertained to that beamformer did  
283 effectively dampen artifacts—and hence strengthen results derived from source-space data—,  
284 we estimated the coherence between speech temporal envelope and MEG signals while  
285 partialling out the contribution of MEG signals recorded at sensors on the edge of the sensor  
286 array.

287 The following analysis was performed separately at 0.5 Hz and 4–8 Hz. For each  
288 gradiometer pair on the edge of the sensor array (23 in total), we estimated the orientation in  
289 the 2-d space spanned by both gradiometer signals (Bourguignon et al., 2015) yielding the  
290 maximum coherence with speech temporal envelope. Partial coherence was then estimated  
291 between speech temporal envelope and all gradiometer signals (again optimizing on the  
292 orientation within all pairs) while partialling out edge gradiometer signal in its optimal  
293 orientation (Halliday, 1995). This led to as many sensor distribution of partial coherence as  
294 there are edge gradiometer pairs. For each sensor, we retained the minimum partial coherence  
295 value across all these edge gradiometer pairs.

## 296 **2.8. Statistical analyses**

### 297 **2.8.1 Reading pace**

298 The word per minute rate produced in the *read* condition by the participants was  
299 compared to the one of the texts used in the *listen* condition with a paired *t*-test.

### 300 **2.8.2. Significance of subject-level coherence in the sensor space**

301 We evaluated the statistical significance of sensor-space coherence values, using  
302 surrogate-data-based statistics (Faes et al., 2004). For each participant, condition, and  
303 frequency range of interest (i.e., 0.5 Hz and 4–8 Hz), we extracted the maximum across  
304 gradiometer pairs of the mean coherence across the frequency range of interest. This

305 maximum genuine coherence was then compared to a distribution of 1000 surrogate values  
306 computed in the same way, but with speech temporal envelope replaced by its Fourier  
307 transform surrogate (Faes et al., 2004). Fourier transform surrogate preserves the power  
308 spectrum but destroys the phase information by replacing the phase of Fourier coefficients by  
309 random numbers in the range  $[-\pi ; \pi]$  (Faes et al., 2004). Genuine maximum coherence  
310 values were deemed significant when they exceeded the 95<sup>th</sup> percentile of their surrogate  
311 distribution.

312

### 313 2.8.3. Significance of group-level coherence in the source space

314 The statistical significance of group-level coherence maps was assessed with non-  
315 parametric permutation test. First, participant- and group-level *rest* coherence maps at the  
316 frequencies of interest (i.e., 0.5 Hz and 4–8 Hz) were computed with *rest* MEG and voice (of  
317 *read* and *listen* conditions) signals. Group-level difference maps were obtained by subtracting  
318 *f*-transformed genuine (*read*, *listen* or *playback*) and *rest* group-level coherence maps for  
319 each frequency of interest. Under the null hypothesis that coherence maps are the same  
320 whatever the experimental condition, the labeling genuine or *rest* are exchangeable prior to  
321 difference map computation (Nichols and Holmes, 2002). To reject this hypothesis and to  
322 compute a significance threshold for the correctly labeled difference map, the sample  
323 distribution of the maximum of the difference map's absolute value within the preselected  
324 brain areas was computed from a subset of 1000 permutations. The threshold at  $p < 0.05$  was  
325 computed as the 95 percentile of the sample distribution (Nichols and Holmes, 2002). All  
326 supra-threshold local coherence maxima were interpreted as indicative of brain regions  
327 showing statistically significant coupling with the produced (*read*) or heard (*listen* and  
328 *playback*) sounds.

#### 329 2.8.4. Comparison of source location between conditions

330 The coordinates of significant local coherence maxima were statistically compared  
331 between conditions (*listen vs. playback*, *listen vs. read*, and *playback vs. read*) using the  
332 location-comparison approach proposed by Bourguignon et al. (2017). This method uses a  
333 bootstrap procedure (Efron, 1979) to estimate the sample distribution of coordinates of the  
334 two local coherence maxima under comparison and tests the null hypothesis that the distance  
335 between them is zero. Briefly, we generated 1000 group-level maps of the conditions under  
336 assessment by random bootstrapping from the individual maps, and identified the coordinates  
337 of the local maxima closest to the genuine maxima location. The resulting sample distribution  
338 of coordinate difference was then submitted to a multivariate location test evaluating the  
339 probability that this difference is zero (Bourguignon et al., 2017). That test tightly relates to  
340 the multivariate  $T^2$  test (Hotelling, 1931) and assumes that the sample distribution of  
341 coordinates difference is normal.

342 For one local maximum, we further tested the—*a posteriori*—hypothesis that its  
343 bootstrap coordinate distribution was bimodal rather than unimodal, suggesting that two  
344 separate sources would contribute to that single local maximum. As a first step, we built a  
345 map of bootstrap source density with 1-mm cubic voxels, which we will denote  $D(r)$  with  $r =$   
346  $(x,y,z)$  indexing voxels.  $D(r)$  was initially set to be uniformly 0, and for each bootstrap source  
347 coordinate, we added a value 1 at the corresponding voxel.  $D(r)$  was further smoothed with a  
348 5-mm FWHM gaussian kernel. We then used matlab *fminsearch* function to fit two models to  
349  $D(r)$ : a Gaussian distribution, and a mixture of 2 Gaussian distributions. Formally, the first  
350 model was

$$351 \quad M_1(r) = G(r|A_1, \mu_1, \Sigma_1),$$

352 and the second model was

$$353 \quad M_2(r) = G(r|A_1, \mu_1, \Sigma_1) + G(r|A_2, \mu_2, \Sigma_2),$$

354 where

$$355 \quad G(r|A, \mu, \Sigma) = A \exp\left(-\frac{1}{2}(r - \mu)\Sigma^{-1}(r - \mu)\right)$$

356 is a 3-d Gaussian distribution with  $A$  its amplitude,  $\mu = (\mu_x, \mu_y, \mu_z)$  its center, and

$$357 \quad \Sigma = \begin{pmatrix} \sigma_x & c_{xy} & c_{xz} \\ c_{xy} & \sigma_y & c_{yz} \\ c_{xz} & c_{yz} & \sigma_z \end{pmatrix}$$

358 its—symmetric—covariance matrix. Hence, there were  $df_1 = 10$  parameters in  $M_1(r)$  and  $df_2 =$   
359 20 in  $M_2(r)$ . We then used a Fisher test to compare statistically the proportion of variance  
360 explained by these two models. These proportions can be written as  
361  $r_i = \|D(\cdot) - M_i(\cdot)\|^2 / \|D(\cdot)\|^2$ , with  $i \in [1, 2]$  and  $\|\cdot\|^2$  the sum of squares across all  
362 voxels. Under the null hypothesis that  $M_2$  does not do any better than  $M_1$ , the quantity

$$363 \quad F = \frac{r_2 - r_1}{df_2 - df_1} \bigg/ \frac{r_2}{df_2}$$

364 follows a  $F$  distribution with  $df_1$  and  $df_2$  degrees of freedom. This null hypothesis can be  
365 disproved if  $F$  exceeds the percentile 95<sup>th</sup> of  $F_{10,20}$ .

366 2.8.5. Significance of individual subjects' rPDC values and comparison between coupling  
367 directions

368 We evaluated the number of participants showing statistically significant rPDC, using  
369 surrogate-data-based statistics (Faes et al., 2010). Statistical analyses were performed on  
370 rPDC at 0.5 Hz or 4–8 Hz depending on whether the source was identified on  
371 phrasal/sentential- or syllable-level coherence map. For each participant, selected brain area,  
372 and coupling direction, the genuine rPDC value (at 0.5 Hz or the mean across 4–8 Hz) was  
373 compared to a distribution of 1000 surrogate rPDC values derived from causal Fourier  
374 transform surrogate data (Faes et al., 2010). Causal Fourier transform surrogate data were  
375 generated with the estimated VAR model wherein coupling in the specific causal direction

376 being tested is abolished by setting to 0 the associated coefficients. Genuine rPDC values  
377 were deemed significant when they exceeded the 95<sup>th</sup> percentile of their surrogate  
378 distribution.

379 Values of rPDC were compared between speech → brain and brain → speech  
380 directions using paired t-tests across participants.

### 381 2.8.6. ANOVA assessment of coherence, rPDC, and partial coherence values

382 Source-level coherence, rPDC and sensor-level partial coherence values were  
383 analyzed with 2-way repeated measures ANOVAs. In these assessments, the factors were the  
384 condition (*listen*, *playback*, and *read*), and the sensor/source location. ANOVAs were run  
385 separately for 0.5 Hz and 4–8 Hz coupling, and for speech → brain and brain → speech  
386 directions in case of rPDC assessment. This is justified by that coupling values within these  
387 two classes had relatively different variances. Analysing data together would have violated  
388 the homoscedasticity assumption of the ANOVA. For source-level coherence values, the  
389 dependent variable was the maximum coherence across a 10-mm sphere centered on  
390 significant local maxima of group-level coherence maps. For sensor-level partial coherence  
391 values, the dependent variable was the maximum partial coherence across subsets of  
392 gradiometer pairs showing the peaks of coherence. Formally, these subsections comprised the  
393 9 gradiometers of maximum coherence averaged across participants and conditions. There  
394 were 2 selections, one for the left and one for the right hemisphere.

### 395 **2.9. Data and software availability**

396 Data and analysis scripts are available upon reasonable request to the corresponding  
397 author.

398



### 399 3. Results

#### 400 3.1 Reading pace

401 In the *read* condition, participants read at a pace of  $158 \pm 17$  words per min (mean  $\pm$   
402 SD). This pace was not significantly different from the one they heard in the *listen* condition  
403 ( $t_{16} = 1.26, p = 0.23$ ).

#### 404 3.2 Coherence results

##### 405 3.2.1 Coherence in the sensor space

406 Figure 1 illustrates the results of speech brain tracking quantified with coherence in  
407 the sensor space. The maximum coherence between MEG signals and speech temporal  
408 envelope peaked at 0.5 Hz and at 4–8 Hz. These frequency ranges match the supra-second  
409 phrasal/sentential time-scale (0.5 Hz) and the 150–300-ms syllable time-scale (4–8 Hz). In  
410 both listening conditions (*listen* & *playback*), the topography of the coherence was  
411 characterized by clusters over bilateral posterior temporal sensors. In the *read* condition,  
412 coherence topographies were suggestive of the presence of strong artifacts but also of  
413 genuine bilateral activity arising from posterior temporal sensors (more convincingly so at  
414 0.5 Hz than at 4–8 Hz).

415 Coherence in the sensor space was significant in all participants and conditions at 0.5  
416 Hz, and in 13 (*listen*), 12 (*playback*), and 17 (*read*) out of 17 participants at 4–8 Hz. Note that  
417 the detection rate of significant coherence in the *read* condition has likely been inflated by  
418 the presence of artifacts inherent to speech production.

##### 419 3.2.2 Coherence in the source space

420 Figure 2A presents the source-space coherence maps obtained with DICS at 0.5 Hz  
421 and 4–8 Hz separately.

422 Table 1 presents the MNI coordinates of significant local coherence maxima observed  
423 in source-space maps.

424 In both listening conditions (*listen & playback*) significant local coherence maxima  
425 localized in bilateral cortex around posterior superior temporal sulcus (pSTS) at 0.5 Hz and in  
426 bilateral supratemporal auditory cortex (STAC) at 4–8 Hz. The location comparison test  
427 revealed no statistically significant difference in location between these two conditions ( $p >$   
428 0.5; 4 comparisons: 2 frequencies  $\times$  2 hemispheres).

429 In the *read* condition, source reconstruction results emphasized the presence of  
430 genuine speech brain tracking. Some artifacts remained that peaked nearby the pons (0.5 Hz,  
431 MNI [-1 -1 -35], coherence 0.049; 4–8 Hz, MNI [2 -14 -36], coherence 0.028), but they  
432 did not overshadow coherence local maxima related to genuine speech brain tracking (see  
433 Figure 2A and Table 1 for peak coordinates and coherence values).

434 The speech brain tracking elicited by the *read* condition appeared to be different from  
435 that during listening conditions at both 0.5 Hz and 4–8 Hz. We focus below on the  
436 comparison between *read* and *listen*, but similar results were obtained from the comparison  
437 between *read* and *playback*.

438 At 0.5 Hz, right-hemisphere local coherence maxima in *read* and *listen* were distant  
439 of only 3 mm, a distance that was not statistically significant ( $F_{3,998} = 0.052$ ,  $p = 0.98$ ). In the  
440 left hemisphere, they were distant of 19 mm, which, surprisingly, was not deemed  
441 statistically significant either ( $F_{3,998} = 1.41$ ,  $p = 0.24$ ). Detailed analyses revealed that this  
442 lack of significance pertained to that coordinates of local coherence maxima in the *listen*  
443 condition had a bimodal — rather than unimodal — distribution, which hampered the  
444 location-comparison test. Indeed, maps of source density revealed that coherence in the *listen*  
445 condition peaked mainly at pSTS ([-66 -27 1]) but also at STAC ([-64 -13 6]). Also, a  
446 model with 2 Gaussian distributions explained 99.90% of the variance of the source density

447 map, which was significantly better than the 95.76% explained by a model based on a single  
448 Gaussian distribution ( $F_{10,20} = 7.40$ ,  $p < 0.0001$ ). In the 2-Gaussian model, individual  
449 distributions were centered on  $[-66.3 \ -27.5 \ 1.1]$  and  $[-64.0 \ -15.1 \ 5.5]$ . Relative  
450 importance of the two Gaussian distributions ( $\|G(\cdot|A_1, \mu_1, \Sigma_1)\|/\|G(\cdot|A_2, \mu_2, \Sigma_2)\|$ ) was  
451 5.3, indicating that group-level coherence in the *listen* condition peaked  $\sim 5.3$  times more  
452 often in the first than in the second cluster. Also, the center of this second cluster was only  
453 8.6 mm away from the maximum in the *read* condition. Of notice, there was only one peak in  
454 the source density map of the *read* condition. These results indicate that reading aloud elicits  
455 speech brain tracking only in STAC while speech listening also recruits the cortex around the  
456 pSTS.

457 At 4–8 Hz, local coherence maxima in the *read* condition localized in bilateral  
458 parietal operculum, i.e., more dorsally (above the sylvian fissure) than those in the *listen*  
459 condition by 19 mm (left hemisphere) and 11 mm (right hemisphere). The location-  
460 comparison test confirmed that this difference in location between *read* and *listen* conditions  
461 was statistically significant (left hemisphere,  $F_{3,998} = 10.10$ ,  $p < 0.0001$ ; right hemisphere,  
462  $F_{3,998} = 3.49$ ,  $p = 0.015$ ).

### 463 3.2.3 Effect of conditions on the coherence strength

464 Speech brain tracking values quantified with coherence at condition-specific  
465 dominant sources were compared with repeated measures ANOVA, separately at 0.5 Hz and  
466 4–8 Hz.

467 At 0.5 Hz there was a main effect of condition on coherence level ( $F_{2,32} = 8.10$ ,  $p =$   
468  $0.0014$ ), no significant main effect of hemisphere ( $F_{1,16} = 0.20$ ,  $p = 0.66$ ), and no significant  
469 interaction ( $F_{2,32} = 1.95$ ,  $p = 0.16$ ). Post-hoc t-tests revealed that coherence values in *listen*  
470 ( $0.092 \pm 0.039$ , mean  $\pm$  SD of the mean coherence across hemispheres) and *playback* ( $0.090$   
471  $\pm 0.046$ ) did not differ significantly ( $t_{16} = 0.21$ ,  $p = 0.84$ ), while values in *read* ( $0.057 \pm$

472 0.022) were significantly lower than those in *listen* ( $t_{16} = 3.95, p = 0.0012$ ) and *playback* ( $t_{16}$   
473  $= 3.47, p = 0.0031$ ).

474 At 4–8 Hz there was a main effect of condition on coherence level ( $F_{2,32} = 16.6, p <$   
475  $0.0001$ ), no significant main effect of hemisphere ( $F_{1,16} = 2.23, p = 0.15$ ), and no significant  
476 interaction ( $F_{2,32} = 0.06, p = 0.94$ ). Post-hoc t-tests revealed that coherence values in *listen*  
477 ( $0.0183 \pm 0.0052$ ) and *playback* ( $0.0191 \pm 0.052$ ) did not differ significantly ( $t_{16} = 0.58, p =$   
478  $0.57$ ), while values in *read* ( $0.0294 \pm 0.0086$ ) were significantly higher than those in *listen*  
479 ( $t_{16} = 4.28, p = 0.0006$ ) and *playback* ( $t_{16} = 4.37, p = 0.0005$ ).

### 480 **3.3. Directionality results**

481 rPDC was used to separate the relative contributions to speech brain tracking of  
482 signals reacting to speech (i.e., external feedback monitoring system) and signals preceding  
483 speech (i.e., internal speech monitoring system).

484 Figure 3 presents rPDC values in all conditions.

485 Table 2 details the number of participants displaying significant rPDC in all  
486 conditions, directions and frequency of interest.

487 Paired t-tests revealed that rPDC was systematically higher in the speech  $\rightarrow$  brain  
488 direction than in the brain  $\rightarrow$  speech direction ( $ps < 0.05$ ) except at 0.5 Hz in the left  
489 hemisphere in the *read* condition ( $t_{16} = 1.61, p = 0.13$ ).

490 The ANOVA assessment of rPDC values was performed with factors condition  
491 (*listen*, *playback* and *read*) and hemisphere (left and right) separately at 0.5 Hz and 4–8 Hz,  
492 and for the two coupling directions. There was a significant main effect of condition on  
493 speech  $\rightarrow$  brain rPDC at 0.5 Hz ( $F_{2,32} = 4.66, p = 0.017$ ) explained by that values in *read*  
494 ( $10.8 \pm 7.2$ , mean  $\pm$  SD of the mean rPDC across hemispheres) were lower than those in  
495 *listen* ( $16.9 \pm 7.9; t_{16} = 2.70, p = 0.016$ ) and *playback* ( $17.0 \pm 11.9; t_{16} = 3.45, p = 0.0033$ ),  
496 while the two latter did not differ significantly ( $t_{16} = 0.063, p = 0.95$ ). There was also a

497 significant effect of condition on brain → speech rPDC at 4–8 Hz ( $F_{2,32} = 8.43, p = 0.0011$ )  
498 explained by that values in *read* ( $2.75 \pm 0.74$ ) were higher than those in *listen* ( $2.06 \pm 0.38$ ;  
499  $t_{16} = 2.90, p = 0.011$ ) and *playback* ( $2.02 \pm 0.38; t_{16} = 3.50, p = 0.0030$ ), while two latter did  
500 not differ significantly ( $t_{16} = 0.30, p = 0.77$ ). There were no other significant main effects or  
501 interactions ( $ps > 0.1$ ).

502 As it is unclear how artifacts contributed to these results, we repeated the rPDC  
503 analysis between speech temporal envelope and signals from a sensor that picked up strong  
504 artifacts (left hemisphere: MEG153\*; right hemisphere: MEG263\*). The ANOVA  
505 assessment of these rPDC values revealed in all 4 instances (2 coupling directions × 2  
506 frequency ranges) a significant effect of condition ( $ps < 0.05$ ) explained by higher values in  
507 *read* than in *listen* and *playback*.

508

### 509 **3.4. Partial coherence**

510 Figure 4 illustrates speech brain tracking in sensor space controlled for artifacts in  
511 edge sensors using partial coherence. It is noteworthy that in *read* condition, artifacts were  
512 substantially suppressed by using partial coherence, while coherence at bilateral auditory  
513 cortices was essentially preserved. Moreover, partial coherence values were quite faithful to  
514 the source-space coherence values, as can be seen in group-level values displayed in Table 1  
515 (similarity in source coherence and sensor partial coherence values).

516 Partial coherence levels were compared with repeated measures ANOVA with factors  
517 condition (*listen, playback* and *read*) and hemisphere (left and right) separately at 0.5 Hz and  
518 4–8 Hz. At 0.5 Hz, there were no significant effects nor interaction ( $ps > 0.5$ ). At 4–8 Hz  
519 there was a main effect of condition ( $F_{2,32} = 18.3, p < 0.0001$ ), no significant main effect of  
520 hemisphere ( $F_{1,16} = 1.27, p = 0.28$ ), and no significant interaction ( $F_{2,32} = 0.57, p = 0.57$ ).  
521 Partial coherence values in *read* ( $0.0292 \pm 0.0106$ , mean ± SD of the mean coherence across

522 hemispheres) were higher than those in *listen* ( $0.0157 \pm 0.0049$ ;  $t_{16} = 4.38$ ,  $p = 0.0005$ ) and  
523 *playback* ( $0.0158 \pm 0.0046$ ;  $t_{16} = 4.41$ ,  $p = 0.0004$ ), while two latter did not differ  
524 significantly ( $t_{16} = 0.14$ ,  $p = 0.89$ ).

525

## 526 **4. Discussion**

527 This study demonstrates that during reading aloud, the speaker's brain tracks the slow  
528 temporal fluctuations of speech output. The auditory cortex tracks sentence/phrase structure  
529 (<1 Hz) while parietal operculum tracks syllable structure (4–8 Hz). It also brings novel  
530 insights into the neural bases of speech production monitoring systems while reading aloud.

531

### 532 **4.1. Speech brain tracking at frequencies <1 Hz**

533 We found that <1-Hz speech brain tracking was attenuated during self-produced  
534 speech compared with listening to external speech. A control analysis, however, failed to  
535 corroborate this finding as it indicated similar rather than lower level of <1-Hz tracking  
536 during reading compared with listening. An attenuation would be well in line with the  
537 literature. Indeed, auditory cortical responses (i.e., N100/M100 evoked response) to self-  
538 produced speech are typically attenuated or suppressed compared with those obtained during  
539 listening to a playback recording of the same sounds or during silent reading of a text (Curio  
540 et al., 2000; Houde et al., 2002; Numminen et al., 1999; Numminen and Curio, 1999). Such  
541 attenuation is absent when the auditory feedback is altered (e.g., pitch-shifted or alien speech  
542 feedback) (Heinks-Maldonado et al., 2006, 2005).

543 Our results also indicate that <1-Hz speech brain tracking while reading aloud is  
544 dominated by the speech feedback monitoring system. Indeed, both reading and listening  
545 gave rise to similarly low level of <1-Hz brain  $\rightarrow$  speech coupling, which we posit, is the  
546 hallmark of reliance on forward models. Note that the significant brain  $\rightarrow$  speech coupling

547 observed in ~30% of the subjects was most likely spurious, i.e., related to the fact that, in  
548 directionality assessment, strong coupling in one direction generates spurious coupling in the  
549 other direction (Faes et al., 2010).

550 Our results also shed light on the neural network involved in monitoring <1-Hz  
551 fluctuations in speech temporal envelope. During speech listening, this network seems to  
552 include the STAC and cortex around pSTS, while it only involves the STAC during reading  
553 aloud. This suggests that during self-generated speech, sensory feedback at phrasal/sentential  
554 level is mainly processed at early auditory cortices.

555

#### 556 **4.2. Speech brain tracking at 4–8 Hz**

557 At 4–8 Hz, speech brain tracking was stronger when reading aloud than during  
558 passive listening and it peaked in different cortical areas, i.e., STAC during listening and  
559 parietal operculum during reading aloud. Tracking was mainly driven by the speech → brain  
560 contribution during reading aloud similarly to the listening conditions. There was however a  
561 significant enhancement in brain → speech coupling during reading compared with listening  
562 conditions.

563 In humans, speech temporal envelope essentially fluctuates at 2–10 Hz, peaking at ~5  
564 Hz (Ding et al., 2017). This corresponds to the mean syllable rate of speech (5–8 Hz) across  
565 many languages (Pellegrino et al., 2011). These findings led some authors to consider that  
566 this frequency range likely indicates universal rhythmic properties of human speech  
567 constrained by the neural dynamics of speech production/perception and the biomechanical  
568 properties of human articulator (Ding et al., 2017). Interestingly, a previous MEG study  
569 demonstrated the existence of significant coupling between ventral primary sensorimotor  
570 (SM1) cortex (i.e., mouth area) and orbicular oris muscle activities during silent mouthing of  
571 a syllable (/pa/) periodically repeated at different frequencies (i.e., 0.8–5 Hz) (Ruspantini et

572 al., 2012). This coupling phenomenon was driven by the mouth movement repetition rate  
573 during syllable mouthing and peaked at the individual spontaneous movement rate (i.e., self-  
574 paced rate of syllable articulation: ~2–3 Hz). It is therefore probably analogous (for a detailed  
575 discussion, see Bourguignon et al., n.d.) to the previously described cortico-kinematic  
576 coherence (CKC) phenomenon, which is the coupling between the kinematics of finger or toe  
577 movements and the activity in the SM1 cortex corresponding to the moved limb  
578 (Bourguignon et al., 2012, 2011; Marty et al., 2015; Marty et al., 2015; Piitulainen et al.,  
579 2015). CKC indeed occurs at movement frequency (and harmonics), which is rather similarly  
580 visible in the rectified surface electromyogram and other kinematic-related signals such as  
581 acceleration, force and pressure (Piitulainen et al., 2013). Of note, CKC is mainly driven by  
582 proprioceptive afferents to SM1 cortex (Bourguignon et al., 2015; Piitulainen et al., 2013).  
583 Accordingly, our data suggests that during connected speech production, self-generated  
584 proprioceptive and auditory information resulting from syllable production are monitored in  
585 ventral SM1 cortex. In particular, the multimodal (i.e., somatosensory and auditory) nature of  
586 such speech-related sensory monitoring at SM1 cortex is supported by the rather low  
587 correlation between rhythmical lip movement and auditory speech temporal envelope during  
588 speech production (see, e.g., Bourguignon et al., 2018; Chandrasekaran et al., 2009; Park et  
589 al., 2016). The observed frequency-specific auditory feedback monitoring at SM1 cortex is in  
590 agreement with the external feedback monitoring system and the sensorimotor transformation  
591 theories of speech (Cogan et al., 2014; Hickok, 2012; Houde and Chang, 2015). Critically,  
592 the present study suggests that the neocortical areas involved in 4–8 Hz speech brain tracking  
593 are different during speech perception and production, which brings novel major insights into  
594 the neural bases of speech external feedback monitoring systems. Finally, the fact that the 4–  
595 8-Hz brain → speech coupling was significantly enhanced during reading (compared to  
596 listening) also suggests that the brain does generate internal representations of self-produced



597 syllabic sounds, as put forward by the predictive coding theory (Friston, 2010). Importantly,  
598 the motor origin of this effect supports the notion that, in this frequency band, the brain  
599 computes the time-course of the to-be-produced articulation.

600

### 601 **4.3. Methodological considerations**

602 First, there was no difference between *listen* and *playback* conditions in any of the  
603 tested aspects of speech brain tracking. This implies that the effects we uncovered (i) were  
604 not influenced by priming about upcoming speech content (intrinsic to *playback*) and (ii) not  
605 linked to a difference in speech rhythm between *listen* and *read*.

606 Second, neurophysiological mechanisms involved in overt language production are  
607 typically difficult to explore using MEG due to multiple sources of high-amplitude artifacts  
608 (e.g., head and jaw movements, muscular activity, etc.) that contaminate brain signals (see,  
609 e.g., Simmonds et al., 2014). Here, we used tSSS, ICA and threshold-based artifact rejection  
610 to remove these artifacts from brain signals. We then reconstructed brain activity with a  
611 minimum variance beamformer, an approach that specifically passes activity coming from  
612 locations of interest while cancelling external interferences (Hillebrand et al., 2005). Still,  
613 sensor and source speech brain tracking in the production condition indicated the presence of  
614 remaining movement artifacts characterized by coherence values comparable to genuine  
615 speech brain tracking/coherence values. It is therefore probable that these artifacts were mild  
616 and hence not suppressed by tSSS, ICA or beamforming.

617 Beyond attempting to suppress artifacts, we conducted two control analyses designed  
618 to evaluate the impact of remaining artifacts on our results. First, by computing the rPDC  
619 between speech signals and MEG signals at sensors with high amplitude artifacts, we could  
620 demonstrate that reading-induced artifacts spuriously inflate rPDC values in both directions.  
621 This supports our two main findings since reading (compared with listening) was associated

622 with decreased <1 Hz tracking (rather than increased), and specifically increased 4–8 Hz  
623 tracking in the brain → speech direction (rather than in both directions). Finally, we used  
624 partial coherence analysis in sensor space wherein we subtracted the contribution of MEG  
625 signals at sensors on the edge of the sensor array to support our source-level results. This  
626 second control analysis corroborated the finding that 4–8 Hz tracking is enhanced during  
627 reading compared with listening. However, it suggested similar rather than lower level of <1-  
628 Hz tracking during reading compared with listening. Further studies based on artifact free  
629 electrophysiological signals (e.g., intracranial recording; Cogan et al., 2014) will be required  
630 to confirm source-space results. Also, we cannot exclude that the sources of 4–8 Hz tracking  
631 in the reading condition may have been shifted by the artifacts remaining in sensor data.  
632 Invasive electrophysiological recordings are warranted to identify the exact cortical network  
633 involved in tracking of self-produced speech, and specifically, to determine the relative  
634 contribution of STAC and parietal operculum.

635         Despite these limitations that warrant to take the results of this study with some  
636 caution, we demonstrate that the speech brain tracking observed at <1 Hz during *listen* and  
637 *read* is rather similar in terms of brain areas and tracking level. Furthermore, the results  
638 obtained at 4-8 Hz during *read* are in line with those previously reported by Ruspantini et al.  
639 (2012) during syllable production. These data therefore suggest the existence of common  
640 speech brain tracking phenomena during self-generated speech production accompanying  
641 reading aloud and perception while listening to somebody reading a text aloud. The  
642 generalization of these findings to production and perception of natural speech (e.g., during  
643 natural conversation) warrants further investigations. Still, this study represents a first step  
644 towards the understanding of the neural bases and functional aspects of speech brain tracking  
645 during speech production.

646

#### 647 **4.4. Conclusions**

648           This study demonstrates that, during reading aloud, the reader's brain tracks the slow  
649 temporal structure of the self-generated speech. The auditory cortex tracks phrases/sentences  
650 and the parietal operculum tracks syllables. Data also suggests that both tracking mainly  
651 engage feedback monitoring system, but with increased involvement of internal speech  
652 monitoring system for syllable tracking at different neocortical areas than those recruited  
653 during speech perception. In sum, this study brings unprecedented insights into how the  
654 human brain tracks the slow-temporal features of the auditory feedback during self-  
655 generation of speech.

656

657

#### 658 **5. Acknowledgments**

659           Mathieu Bourguignon has been supported by the program Attract of Innoviris (grant  
660 2015-BB2B-10), by the Spanish Ministry of Economy and Competitiveness (grant PSI2016-  
661 77175-P), and by the Marie Skłodowska-Curie Action of the European Commission (grant  
662 743562). Nicola Molinaro has been supported by the Spanish Ministry of Economy and  
663 Competitiveness (grant PSI2015-65694-P), the Agencia Estatal de Investigación (AEI), the  
664 Fondo Europeo de Desarrollo Regional (FEDER) and by the Basque government (grant  
665 PI\_2016\_1\_0014). Mikel Lizarazu has been supported by the Agence Nationale pour la  
666 Recherche (grants ANR-10-LABX-0087 IEC and ANR-10-IDEX-0001-02 PSL). Xavier De  
667 Tiège is Post-doctorate Clinical Master Specialist at the Fonds de la Recherche Scientifique  
668 (F.R.S.-FNRS, Brussels, Belgium).

669           This research was supported by the Basque Government through the BERC 2018-  
670 2021 program and by the Spanish State Research Agency through BCBL Severo Ochoa

671 excellence accreditation SEV-2015-0490. The MEG project at the CUB Hôpital Erasme is  
672 financially supported by the Fonds Erasme.

673

674

## 675 6. References

- 676 Alexandrou, A.M., Saarinen, T., Mäkelä, S., Kujala, J., Salmelin, R., 2017. The right  
677 hemisphere is highlighted in connected natural speech production and perception.  
678 *Neuroimage* 152, 628–638.
- 679 Ashburner, J., Friston, K.J., 1999. Nonlinear spatial normalization using basis functions.  
680 *Hum. Brain Mapp.* 7, 254–266.
- 681 Ashburner, J., Neelin, P., Collins, D.L., Evans, A., Friston, K., 1997. Incorporating prior  
682 knowledge into image registration. *Neuroimage* 6, 344–352.
- 683 Bauer, J.J., Mittal, J., Larson, C.R., Hain, T.C., 2006. Vocal responses to unanticipated  
684 perturbations in voice loudness feedback: an automatic mechanism for stabilizing voice  
685 amplitude. *J. Acoust. Soc. Am.* 119, 2363–2371.
- 686 Blackmer, E.R., Mitton, J.L., 1991. Theories of monitoring and the timing of repairs in  
687 spontaneous speech. *Cognition* 39, 173–194.
- 688 Bóna, J., 2014. Temporal characteristics of speech: the effect of age and speech style. *J.*  
689 *Acoust. Soc. Am.* 136, EL116–21.
- 690 Bortel, R., Sovka, P., 2014. Approximation of the null distribution of the multiple coherence  
691 estimated with segment overlapping. *Signal Processing* 96, 310–314.
- 692 Bourguignon, M., Baart, M., Kapnoula, E.C., Molinaro, N., 2018. Hearing through lip-  
693 reading: the brain synthesizes features of absent speech. <https://doi.org/10.1101/395483>
- 694 Bourguignon, M., De Tiège, X., de Beeck, M.O., Ligot, N., Paquier, P., Van Bogaert, P.,  
695 Goldman, S., Hari, R., Jousmäki, V., 2013. The pace of prosodic phrasing couples the  
696 listener's cortex to the reader's voice. *Hum. Brain Mapp.* 34, 314–326.
- 697 Bourguignon, M., De Tiège, X., Op de Beeck, M., Pirotte, B., Van Bogaert, P., Goldman, S.,  
698 Hari, R., Jousmäki, V., 2011. Functional motor-cortex mapping using corticokinematic  
699 coherence. *Neuroimage* 55, 1475–1479.
- 700 Bourguignon, M., Jousmäki, V., Dalal, S.S., Jerbi, K., De Tiège, X., n.d. Coupling between  
701 human brain activity and body movements: insights from non-invasive electromagnetic  
702 recordings. *Neuroimage*.
- 703 Bourguignon, M., Jousmäki, V., Op de Beeck, M., Van Bogaert, P., Goldman, S., De Tiège,  
704 X., 2012. Neuronal network coherent with hand kinematics during fast repetitive hand  
705 movements. *Neuroimage* 59, 1684–1691.
- 706 Bourguignon, M., Molinaro, N., Wens, V., 2017. Contrasting functional imaging parametric  
707 maps: The mislocation problem and alternative solutions. *Neuroimage* 169, 200–211.
- 708 Bourguignon, M., Piitulainen, H., De Tiège, X., Jousmäki, V., Hari, R., 2015.  
709 Corticokinematic coherence mainly reflects movement-induced proprioceptive  
710 feedback. *Neuroimage* 106, 382–390.
- 711 Burnett, T.A., Freedland, M.B., Larson, C.R., Hain, T.C., 1998. Voice F0 responses to  
712 manipulations in pitch feedback. *J. Acoust. Soc. Am.* 103, 3153–3161.
- 713 Chandrasekaran, C., Trubanova, A., Stillitano, S., Caplier, A., Ghazanfar, A.A., 2009. The  
714 natural statistics of audiovisual speech. *PLoS Comput. Biol.* 5, e1000436.

- 715 Clumeck, C., Suarez Garcia, S., Bourguignon, M., Wens, V., Op de Beeck, M., Marty, B.,  
716 Deconinck, N., Soncarrieu, M.-V., Goldman, S., Jousmäki, V., Van Bogaert, P., De  
717 Tiège, X., 2014. Preserved coupling between the reader's voice and the listener's cortical  
718 activity in autism spectrum disorders. *PLoS One* 9, e92329.
- 719 Cogan, G.B., Thesen, T., Carlson, C., Doyle, W., Devinsky, O., Pesaran, B., 2014. Sensory-  
720 motor transformations for speech occur bilaterally. *Nature* 507, 94–98.
- 721 Curio, G., Neuloh, G., Numminen, J., Jousmäki, V., Hari, R., 2000. Speaking modifies voice-  
722 evoked activity in the human auditory cortex. *Hum. Brain Mapp.* 9, 183–191.
- 723 Destoky, F., Philippe, M., Bertels, J., Verhasselt, M., Coquelet, N., Vander Ghinst, M., Wens,  
724 V., De Tiège, X., Bourguignon, M., 2019. Comparing the potential of MEG and EEG to  
725 uncover brain tracking of speech temporal envelope. *Neuroimage* 184, 201–213.
- 726 Ding, N., Melloni, L., Zhang, H., Tian, X., Poeppel, D., 2016. Cortical tracking of  
727 hierarchical linguistic structures in connected speech. *Nat. Neurosci.* 19, 158–164.
- 728 Ding, N., Patel, A.D., Chen, L., Butler, H., Luo, C., Poeppel, D., 2017. Temporal  
729 modulations in speech and music. *Neurosci. Biobehav. Rev.* 81, 181–187.
- 730 Efron, B., 1979. Bootstrap Methods: Another Look at the Jackknife. *Ann. Stat.* 7, 1–26.
- 731 Faes, L., Pinna, G.D., Porta, A., Maestri, R., Nollo, G., 2004. Surrogate data analysis for  
732 assessing the significance of the coherence function. *IEEE Trans. Biomed. Eng.* 51,  
733 1156–1166.
- 734 Faes, L., Porta, A., Nollo, G., 2010. Testing frequency-domain causality in multivariate time  
735 series. *IEEE Trans. Biomed. Eng.* 57, 1897–1906.
- 736 Friston, K., 2010. The free-energy principle: a unified brain theory? *Nat. Rev. Neurosci.* 11,  
737 127–138.
- 738 Friston, K.J., Frith, C.D., 2015. Active inference, communication and hermeneutics. *Cortex*  
739 68, 129–143.
- 740 Garcés, P., López-Sanz, D., Maestú, F., Pereda, E., 2017. Choice of Magnetometers and  
741 Gradiometers after Signal Space Separation. *Sensors* 17.  
742 <https://doi.org/10.3390/s17122926>
- 743 Gauvin, H.S., De Baene, W., Brass, M., Hartsuiker, R.J., 2016. Conflict monitoring in speech  
744 processing: An fMRI study of error detection in speech production and perception.  
745 *Neuroimage* 126, 96–105.
- 746 Gramfort, A., Luessi, M., Larson, E., Engemann, D.A., Strohmeier, D., Brodbeck, C.,  
747 Parkkonen, L., Hämäläinen, M.S., 2014. MNE software for processing MEG and EEG  
748 data. *Neuroimage* 86, 446–460.
- 749 Gross, J., Hoogenboom, N., Thut, G., Schyns, P., Panzeri, S., Belin, P., Garrod, S., 2013.  
750 Speech rhythms and multiplexed oscillatory sensory coding in the human brain. *PLoS*  
751 *Biol.* 11, e1001752.
- 752 Gross, J., Kujala, J., Hamalainen, M., Timmermann, L., Schnitzler, A., Salmelin, R., 2001.  
753 Dynamic imaging of coherent sources: Studying neural interactions in the human brain.  
754 *Proc. Natl. Acad. Sci. U. S. A.* 98, 694–699.
- 755 Guo, Z., Wu, X., Li, W., Jones, J.A., Yan, N., Sheft, S., Liu, P., Liu, H., 2017. Top-Down  
756 Modulation of Auditory-Motor Integration during Speech Production: The Role of  
757 Working Memory. *J. Neurosci.* 37, 10323–10333.
- 758 Halliday, D., 1995. A framework for the analysis of mixed time series/point process data—  
759 Theory and application to the study of physiological tremor, single motor unit  
760 discharges and electromyograms. *Prog. Biophys. Mol. Biol.* 64, 237–278.
- 761 Heinks-Maldonado, T.H., Mathalon, D.H., Gray, M., Ford, J.M., 2005. Fine-tuning of  
762 auditory cortex during speech production. *Psychophysiology* 42, 180–190.
- 763 Heinks-Maldonado, T.H., Nagarajan, S.S., Houde, J.F., 2006. Magnetoencephalographic  
764 evidence for a precise forward model in speech production. *Neuroreport* 17, 1375–1379.

- 765 Hickok, G., 2012. Computational neuroanatomy of speech production. *Nat. Rev. Neurosci.*  
766 13, 135–145.
- 767 Hillebrand, A., Singh, K.D., Holliday, I.E., Furlong, P.L., Barnes, G.R., 2005. A new  
768 approach to neuroimaging with magnetoencephalography. *Hum. Brain Mapp.* 25, 199–  
769 211.
- 770 Hotelling, H., 1931. The Generalization of Student's Ratio. *Ann. Math. Stat.* 2, 360–378.
- 771 Houde, J.F., 1998. Sensorimotor Adaptation in Speech Production. *Science* 279, 1213–1216.
- 772 Houde, J.F., Chang, E.F., 2015. The cortical computations underlying feedback control in  
773 vocal production. *Curr. Opin. Neurobiol.* 33, 174–181.
- 774 Houde, J.F., Nagarajan, S.S., Sekihara, K., Merzenich, M.M., 2002. Modulation of the  
775 auditory cortex during speech: an MEG study. *J. Cogn. Neurosci.* 14, 1125–1138.
- 776 Hyvärinen, A., Karhunen, J., Oja, E., 2001. Independent Component Analysis.
- 777 Indefrey, P., 2011. The spatial and temporal signatures of word production components: a  
778 critical update. *Front. Psychol.* 2, 255.
- 779 Kawamoto, A.H., Liu, Q., Kello, C.T., 2015. The segment as the minimal planning unit in  
780 speech production and reading aloud: evidence and implications. *Front. Psychol.* 6,  
781 1457.
- 782 Liu, Y., Fan, H., Li, J., Jones, J.A., Liu, P., Zhang, B., Liu, H., 2018. Auditory-Motor Control  
783 of Vocal Production during Divided Attention: Behavioral and ERP Correlates. *Front.*  
784 *Neurosci.* 12, 113.
- 785 Luo, H., Poeppel, D., 2007. Phase patterns of neuronal responses reliably discriminate speech  
786 in human auditory cortex. *Neuron* 54, 1001–1010.
- 787 Marty, B., Bourguignon, M., Jousmäki, V., Wens, V., Op de Beeck, M., Van Bogaert, P.,  
788 Goldman, S., Hari, R., De Tiège, X., 2015. Cortical kinematic processing of executed  
789 and observed goal-directed hand actions. *Neuroimage* 119, 221–228.
- 790 Marty, B., Bourguignon, M., Op de Beeck, M., Wens, V., Goldman, S., Van Bogaert, P.,  
791 Jousmäki, V., De Tiège, X., 2015. Effect of movement rate on corticokinematic  
792 coherence. *Neurophysiol. Clin.* 45, 469–474.
- 793 Molinaro, N., Lizarazu, M., 2017. Delta (but not theta)-band cortical entrainment involves  
794 speech-specific processing. *Eur. J. Neurosci.* <https://doi.org/10.1111/ejn.13811>
- 795 Molinaro, N., Lizarazu, M., Lallier, M., Bourguignon, M., Carreiras, M., 2016. Out-of-  
796 synchrony speech entrainment in developmental dyslexia. *Hum. Brain Mapp.* 37, 2767–  
797 2783.
- 798 Nichols, T.E., Holmes, A.P., 2002. Nonparametric permutation tests for functional  
799 neuroimaging: a primer with examples. *Hum. Brain Mapp.* 15, 1–25.
- 800 Nozari, N., Dell, G.S., Schwartz, M.F., 2011. Is comprehension necessary for error detection?  
801 A conflict-based account of monitoring in speech production. *Cogn. Psychol.* 63, 1–33.
- 802 Numminen, J., Curio, G., 1999. Differential effects of overt, covert and replayed speech on  
803 vowel-evoked responses of the human auditory cortex. *Neurosci. Lett.* 272, 29–32.
- 804 Numminen, J., Salmelin, R., Hari, R., 1999. Subject's own speech reduces reactivity of the  
805 human auditory cortex. *Neurosci. Lett.* 265, 119–122.
- 806 Oldfield, R.C., 1971. Edinburgh Handedness Inventory. *PsycTESTS Dataset.*  
807 <https://doi.org/10.1037/t23111-000>
- 808 Park, H., Kayser, C., Thut, G., Gross, J., 2016. Lip movements entrain the observers' low-  
809 frequency brain oscillations to facilitate speech intelligibility. *Elife* 5.  
810 <https://doi.org/10.7554/elife.14521>
- 811 Park, H., Thut, G., Gross, J., 2018. Predictive entrainment of natural speech through two  
812 fronto-motor top-down channels. <https://doi.org/10.1101/280032>
- 813 Peelle, J.E., Gross, J., Davis, M.H., 2013. Phase-locked responses to speech in human  
814 auditory cortex are enhanced during comprehension. *Cereb. Cortex* 23, 1378–1387.

- 815 Pellegrino, F., Coupé, C., Marsico, E., 2011. Across-Language Perspective on Speech  
816 Information Rate. *Language* 87, 539–558.
- 817 Piitulainen, H., Bourguignon, M., De Tiège, X., Hari, R., Jousmäki, V., 2013. Coherence  
818 between magnetoencephalography and hand-action-related acceleration, force, pressure,  
819 and electromyogram. *Neuroimage* 72, 83–90.
- 820 Piitulainen, H., Bourguignon, M., De Tiège, X., Hari, R., Jousmäki, V., 2013.  
821 Corticokinematic coherence during active and passive finger movements. *Neuroscience*  
822 238, 361–370.
- 823 Piitulainen, H., Bourguignon, M., Hari, R., Jousmäki, V., 2015. MEG-compatible pneumatic  
824 stimulator to elicit passive finger and toe movements. *Neuroimage* 112, 310–317.
- 825 Poeppel, D., 2003. The analysis of speech in different temporal integration windows: cerebral  
826 lateralization as “asymmetric sampling in time.” *Speech Commun.* 41, 245–255.
- 827 Reuter, M., Schmansky, N.J., Rosas, H.D., Fischl, B., 2012. Within-subject template  
828 estimation for unbiased longitudinal image analysis. *Neuroimage* 61, 1402–1418.
- 829 Ruspantini, I., Saarinen, T., Belardinelli, P., Jalava, A., Parviainen, T., Kujala, J., Salmelin,  
830 R., 2012. Corticomuscular coherence is tuned to the spontaneous rhythmicity of speech  
831 at 2-3 Hz. *J. Neurosci.* 32, 3786–3790.
- 832 Schelter, B., Timmer, J., Eichler, M., 2009. Assessing the strength of directed influences  
833 among neural signals using renormalized partial directed coherence. *J. Neurosci.*  
834 *Methods* 179, 121–130.
- 835 Schelter, B., Winterhalder, M., Eichler, M., Peifer, M., Hellwig, B., Guschlbauer, B.,  
836 Lücking, C.H., Dahlhaus, R., Timmer, J., 2006. Testing for directed influences among  
837 neural signals using partial directed coherence. *J. Neurosci. Methods* 152, 210–219.
- 838 Schneider, T., Neumaier, A., 2001. Algorithm 808: ARfit---a matlab package for the  
839 estimation of parameters and eigenmodes of multivariate autoregressive models. *ACM*  
840 *Trans. Math. Softw.* 27, 58–65.
- 841 Shiller, D.M., Sato, M., Gracco, V.L., Baum, S.R., 2009. Perceptual recalibration of speech  
842 sounds following speech motor learning. *J. Acoust. Soc. Am.* 125, 1103–1113.
- 843 Simmonds, A.J., Leech, R., Collins, C., Redjep, O., Wise, R.J.S., 2014. Sensory-motor  
844 integration during speech production localizes to both left and right plana temporale. *J.*  
845 *Neurosci.* 34, 12963–12972.
- 846 Sulpizio, S., Kinoshita, S., 2016. Editorial: Bridging Reading Aloud and Speech Production.  
847 *Front. Psychol.* 7, 661.
- 848 Taulu, S., Simola, J., 2006. Spatiotemporal signal space separation method for rejecting  
849 nearby interference in MEG measurements. *Phys. Med. Biol.* 51, 1759–1768.
- 850 Taulu, S., Simola, J., Kajola, M., 2005. Applications of the signal space separation method.  
851 *IEEE Trans. Signal Process.* 53, 3359–3372.
- 852 Tremblay, S., Shiller, D.M., Ostry, D.J., 2003. Somatosensory basis of speech production.  
853 *Nature* 423, 866–869.
- 854 Vander Ghinst, M., Bourguignon, M., Niesen, M., Wens, V., Hassid, S., Choufani, G.,  
855 Jousmäki, V., Hari, R., Goldman, S., De Tiège, X., 2019. Cortical Tracking of Speech-  
856 in-Noise Develops from Childhood to Adulthood. *J. Neurosci.* 39, 2938–2950.
- 857 Vander Ghinst, M., Bourguignon, M., Op de Beeck, M., Wens, V., Marty, B., Hassid, S.,  
858 Choufani, G., Jousmäki, V., Hari, R., Van Bogaert, P., Goldman, S., De Tiège, X., 2016.  
859 Left Superior Temporal Gyrus Is Coupled to Attended Speech in a Cocktail-Party  
860 Auditory Scene. *J. Neurosci.* 36, 1596–1606.
- 861 Vigario, R., Sarela, J., Jousmiki, V., Hamalainen, M., Oja, E., 2000. Independent component  
862 approach to the analysis of EEG and MEG recordings. *IEEE Transactions on*  
863 *Biomedical Engineering* 47, 589–593.
- 864 Zion Golumbic, E.M., Poeppel, D., Schroeder, C.E., 2012. Temporal context in speech

865 processing and attentional stream selection: a behavioral and neural perspective. *Brain*  
866 *Lang.* 122, 151–161.



867 **7. Tables and Figures:**

868 **Table 1.**

869 MNI coordinates [mm] and coherence values of maximum speech brain tracking, as well as  
 870 corresponding sensor-level coherence values controlled for artifacts in sensors at the edge of  
 871 the sensor array.

872

|                                 | Left hemisphere     |                  |                          | Right hemisphere    |                  |                          |
|---------------------------------|---------------------|------------------|--------------------------|---------------------|------------------|--------------------------|
|                                 | MNI coordinate [mm] | Source coherence | Sensor partial coherence | MNI coordinate [mm] | Source coherence | Sensor partial coherence |
| Speech brain tracking at 0.5 Hz |                     |                  |                          |                     |                  |                          |
| <i>listen</i>                   | [-66 -25 1]         | 0.068            | 0.056                    | [66 -25 7]          | 0.070            | 0.060                    |
| <i>playback</i>                 | [-67 -28 -3]        | 0.063            | 0.046                    | [66 -24 3]          | 0.068            | 0.046                    |
| <i>read</i>                     | [-62 -10 12]        | 0.040            | 0.045                    | [66 -22 6]          | 0.043            | 0.041                    |
| Speech brain tracking at 4–8 Hz |                     |                  |                          |                     |                  |                          |
| <i>listen</i>                   | [-61 -12 7]         | 0.0159           | 0.0138                   | [65 -13 7]          | 0.0162           | 0.0133                   |
| <i>playback</i>                 | [-63 -12 9]         | 0.0153           | 0.0122                   | [65 -11 7]          | 0.0172           | 0.0135                   |
| <i>read</i>                     | [-62 -13 28]        | 0.0209           | 0.0174                   | [65 -10 18]         | 0.0286           | 0.0249                   |

873

874

875 **Table 2.**

876 Number of subjects displaying significant renormalized partial directed coherence (rPDC).

877

|        |                | <i>listen</i> |       | <i>playback</i> |       | <i>read</i> |       |
|--------|----------------|---------------|-------|-----------------|-------|-------------|-------|
|        |                | left          | right | left            | right | left        | right |
| 0.5 Hz | speech → brain | 16            | 15    | 14              | 13    | 10          | 12    |
|        | brain → speech | 4             | 5     | 5               | 3     | 5           | 4     |
| 4–8 Hz | speech → brain | 10            | 8     | 9               | 9     | 12          | 9     |
|        | brain → speech | 0             | 0     | 1               | 1     | 4           | 6     |

878

879

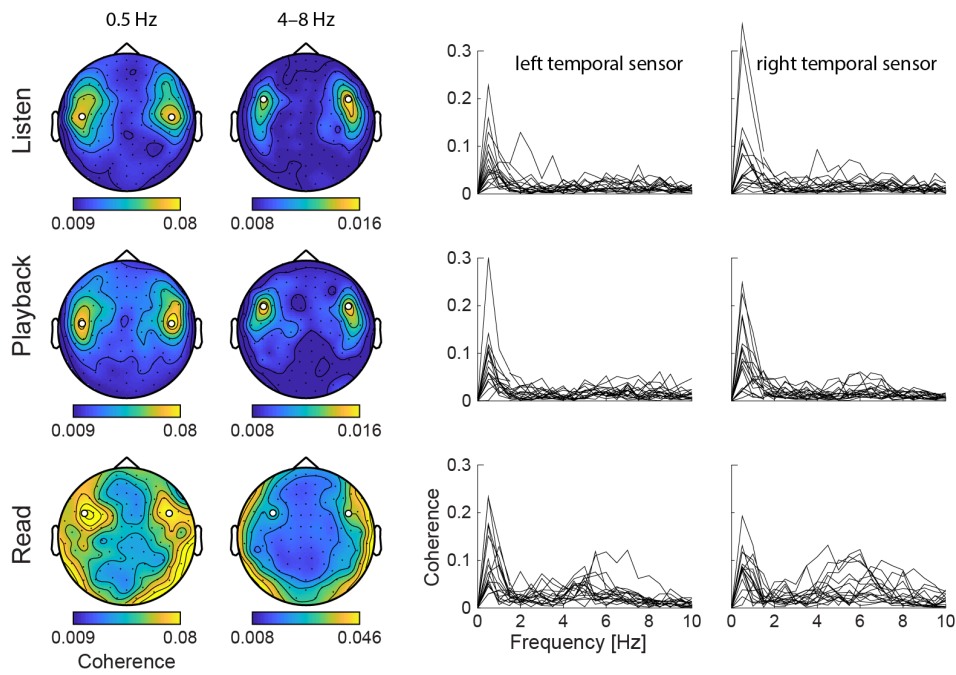

880

881 **Figure 1.** Coherence at the sensor level. *Left*—Sensor distribution of the coherence at 0.5 Hz  
882 and 4–8 Hz averaged across subjects. White discs highlight the sensors of maximum  
883 coherence, or, in the read condition at 4–8 Hz, the sensors suggestive of the presence of  
884 genuine speech brain tracking. *Right*—Individual coherence spectra at the highlighted  
885 sensors. Values from 0 to 1.5 Hz are taken from sensors identified in the 0.5 Hz map, and  
886 values from 1.5 Hz to 10 Hz from the sensors identified in the 4–8 Hz map.

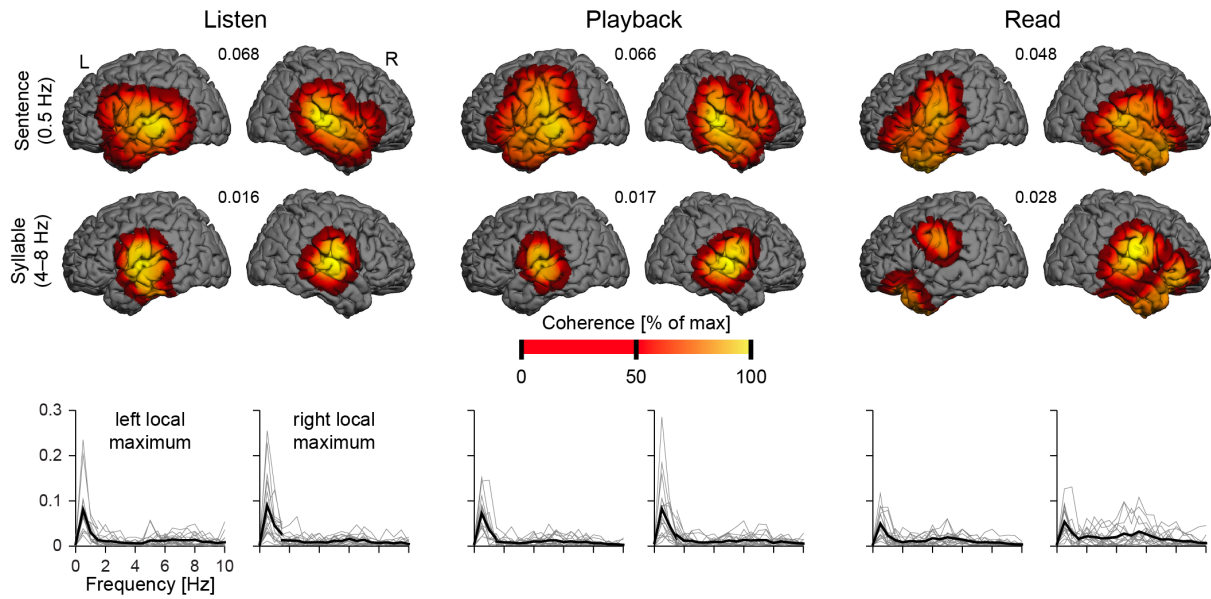

887

888 **Figure 2.** Coherence in the source space. *Top*—Group-level coherence maps at 0.5 Hz and 4–  
889 8 Hz in the 3 conditions (*listen*, *playback* and *read*) thresholded at statistical significance  
890 level. The color scale is tailored to each coherence map: it ranges from 0 to its maximum  
891 (indicated in between brain images). *Bottom*—Individual (gray) and group-averaged (black)  
892 coherence spectra at the local maxima of coherence.

893

894

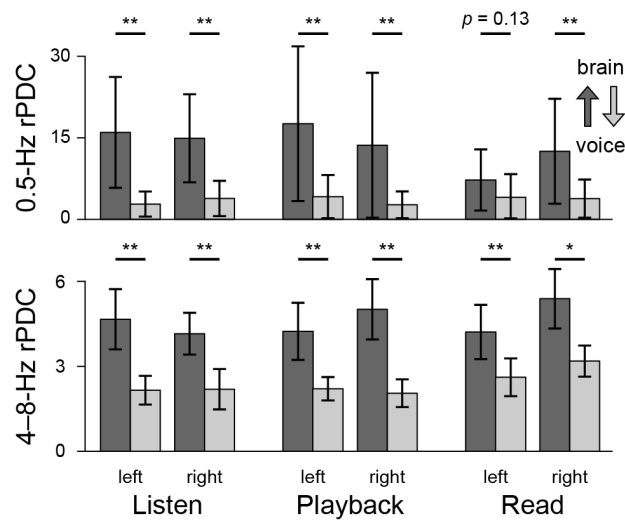

895

896 **Figure 3.** Directionality assessment with renormalized partial directed coherence (rPDC).

897 Bars display the mean and SD of rPDC values. There is one bar per conditions (*listen*,

898 *playback* and *read*), frequency range of interest (0.5 Hz and 4–8 Hz), hemisphere (left and

899 right), and direction (speech → brain and brain → speech). Significance of the comparison

900 between directions are indicated above each pair of bars (\*  $p < 0.05$ , \*\*  $p < 0.01$ ).

901

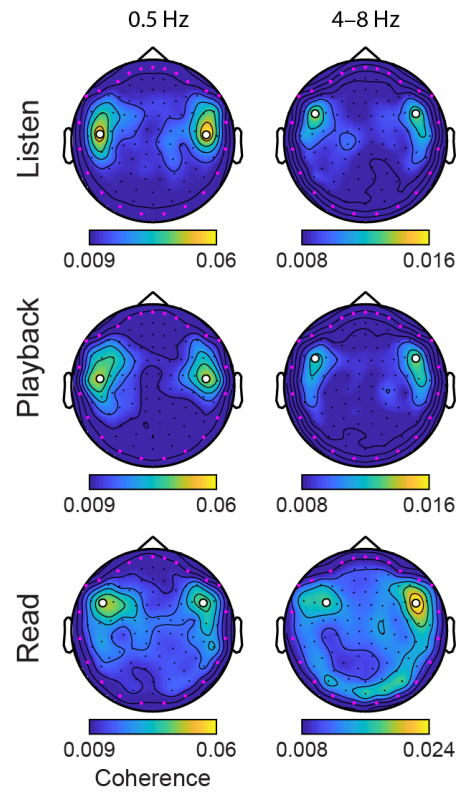

902

903 **Figure 4.** Speech brain tracking at the sensor level assessed with partial coherence to control  
904 for artifacts in edge sensors (highlighted in magenta). Note that topographies at 4–8 Hz are  
905 displayed with a different scale for *read* and listening (*listen* and *playback*) conditions. White  
906 discs highlight the same sensors as those in figure 1. sensors of maximum coherence, or, in  
907 the read condition at 4–8 Hz, the sensors suggestive of the presence of genuine speech brain  
908 tracking.
